# Supplementary material
Source: PubMed Central journal article supplement (PMC3317965)
Supplement: supp_dev.076851_DEV076851TableS1.pdf [file supp_dev.076851_DEV076851TableS1.pdf]

**Table S1. Primer pairs for qPCR.**

| <b>Site</b>  | <b>Primer F (5' → 3')</b> | <b>Primer R (5' → 3')</b> |
|--------------|---------------------------|---------------------------|
| <i>Rpl7</i>  | CCCTGAAGACACTTCGAAAGG     | GCTTTCCTTGCCATCCTAGC      |
| <i>Oct4</i>  | ATGCCGTGAAGTTGGAGAAG      | GAACACCTTTCCAAAGAGAACG    |
| <i>Nanog</i> | ATGCCTGCAGTTTTTCATCC      | GAGCTTTTGTTTGGGACTGG      |
| <i>Ngn3</i>  | TCACTGACTGACCTGCTGCT      | TTGGAAGTGGGACTTCGTG       |
| <i>Ret</i>   | ATGGAGAGGCCAGACAAGT       | GTGAGTCCGAAGGTGTGGAT      |
| <i>Ccnd1</i> | CTCTCCAAAATGCCAGAGG       | AGGGTGGGTTGGAAATGAAC      |
| <i>Stra8</i> | GTTTCCTGCGTGTTCCACAAG     | CACCCGAGGCTCAAGCTTC       |
